# Supplementary material for: Managed Care Organization and the Quality of Diabetes Care
Source: Oxford University Press journal article supplement (doi:10.2337/diacare.27.7.1529), 2004-07-01
Supplement: 1529-sup-dc0313appendices.pdf [file 1529-sup-dc0313appendices.pdf]

**Appendix:** \*The Translating Research Into Action for Diabetes (TRIAD) Study Group

**Pacific Health Research Institute (PHRI):** Principal Investigator: J. David Curb, MD, MPH. Co-Investigators: Beth Waitzfelder, MA; Richard Chung, MD (Hawaii Medical Service Association (HMSA)); Peggy Latare, MD (Kaiser Permanente Hawaii (KPH)); Lynette Honbo, MD (Hawaii State Department of Human Services (HDHS)); R. Adams Dudley, MD (University of California, San Francisco (UCSF)); Beatrice Rodriguez, MD, PhD; Robert Abbott, PhD; Consultant: Joseph Humphry, MD (HMSA); Analysts: Rebecca Glavan; Andrew White, PhD (HMSA); Ken Forbes (KPH); James Cooper, MA (HDHS); Administrative Assistants: Ruth Baldino; Esther Nakano.

**Indiana University Translational Research Center:** Principal Investigator: David G. Marrero, PhD. Project Coordinator: Susanna R. Williams, MSPH. Co-Investigators: Morris Weinberger, PhD; William M. Tierney, MD; M. Sue Kirkman, MD.

**Kaiser Foundation Research Institute:** Principal Investigator and Study Chairman: Joe V. Selby, MD, MPH.; Co Principal Investigator: Andrew J. Karter, PhD; MS. Co-Investigators: Assiamira Ferrara, MD, PhD., Project Director: Bix E. Swain.

**David Geffen School of Medicine at UCLA:** Principal Investigator: Carol M. Mangione, MD, MSPH; Co Principal Investigator: Arleen F. Brown, MD. Project Director: Rebecca Brusuelas. Co-Investigators: Susan Ettner, PhD; Martin F. Shapiro, MD, PhD; Data Analysts: Peter R. Gutierrez; Neil Steers, PhD. Senior Administrator: Carole Nagy.

**University of Medicine and Dentistry of New Jersey (UMDNJ):** Principal Investigator: Monika M. Safford, MD. Co-Investigators: Dorothy A. Caputo, MA, RNC, CDE; Michael Brimacombe, PhD; Louis F. Amorosa, MD; David Hom, MS; David Kountz, MD; Leonard Pogach, MD, MBA; Louise Russell, PhD; Quanwu Zhang, PhD; David Bendich, MD (Horizon Blue Cross Blue Shield); Joseph Singer, MD, John Chard, MD, Ron Snyder, MD (Healthnet). TRIAD-wide Administrative Assistant: Gabrielle Davis, BA.; Program Specialist: Patricia Prata, MPH, CHES.

**The University of Michigan Health System:** Principal Investigator: William H. Herman, MD, MPH. Co-Principal Investigator: Catherine Kim, MD MPH; Project Director: Jennifer Goewey, MHA. Programmer/Analyst: Diane Averill. Research Associates: Ray Burke, MA; Bahman Tabaei, MPH; Honghong Zhou Administrative Assistants: William Sowa; Kelly Fearer.

**TRIAD-Veterans Association:** Principal Investigator: Rodney Hayward, MD. Co-Principal Investigator: Eve Kerr, MD, MPH; Co-Investigators: Sarah Krein, PhD; John Piette, PhD; Project Managers: Fatima Makki, MPH, MSW; Jill Baker, MSW; Data Manager: Jennifer Davis, MPH.

**TRIAD-wide Administrative Data Coordinator:** Barbara R.K. Smith, MHSA Social & Behavioral Research Institute, California State University San Marcos: Richard Serpe, PhD; Allen J. Risley, MS.

**National Institute of Diabetes and Digestive and Kidney Diseases:** Sanford A. Garfield, PhD.

**Division of Diabetes Translation; Centers for Disease Control and Prevention:** Principal Scientist: K.M. Venkat Narayan, MD, M.Sc., M.B.A. Co-Scientists: Theodore Thompson, MS; Edward W. Gregg, PhD; Robert Gerzoff, MS; Michael M. Engelgau, MD, MS; Gloria Beckles, MB.BS, M.Sc, Patrick Boyle, PhD; Mark Stevens, MSPH, MA; David F. Williamson, PhD; Project Administrator: Bernice Moore, M.B.A; Program Specialist: Shay Clayton.

## Appendix

**Appendix Table 1a.** Characteristics of participants with available medical records (chart) and entire TRIAD population.

| <u>Characteristic</u>          | <u>Participants with chart</u> | <u>Entire TRIAD population</u> |
|--------------------------------|--------------------------------|--------------------------------|
| Participants (n)               | 8354                           | 11,921                         |
| Mean age (years)               | 61                             | 60                             |
| Female (%)                     | 54                             | 53                             |
| Race or ethnicity (%)          |                                |                                |
| White non-Hispanic             | 43                             | 40                             |
| Black non-Hispanic             | 17                             | 17                             |
| Hispanic                       | 17                             | 16                             |
| Asian or Pacific Islander      | 14                             | 18                             |
| Other                          | 9                              | 9                              |
| Education (%)                  |                                |                                |
| 8th grade or less              | 11                             | 11                             |
| Some high-school               | 14                             | 14                             |
| High school/GED                | 29                             | 30                             |
| Some college                   | 28                             | 28                             |
| 4-year college graduate        | 9                              | 10                             |
| >4-year college degree         | 9                              | 9                              |
| Annual household income (%)    |                                |                                |
| <\$15,000                      | 32                             | 31                             |
| \$15,000 - \$39,000            | 31                             | 31                             |
| \$40,000 - \$74,999            | 22                             | 23                             |
| ≥\$75,000                      | 14                             | 15                             |
| Interview conducted in Spanish | 3                              | 3                              |

## Appendix

**Appendix Table 1a.** Characteristics of participants with available medical records (chart) and entire TRIAD population (continued).

| <u>Characteristic</u>             | <u>Participants with chart</u> | <u>Entire TRIAD population</u> |
|-----------------------------------|--------------------------------|--------------------------------|
| Diabetes treatment (%)            |                                |                                |
| Diet and exercise only            | 8                              | 8                              |
| Oral medication only              | 61                             | 62                             |
| Insulin only                      | 19                             | 18                             |
| Insulin and oral medication       | 12                             | 12                             |
| Health Status (%)                 |                                |                                |
| Excellent                         | 4                              | 5                              |
| Very good                         | 18                             | 18                             |
| Good                              | 39                             | 40                             |
| Fair                              | 30                             | 30                             |
| Poor                              | 8                              | 8                              |
| Years in managed care (mean)      | 27                             | 24                             |
| Charlson comorbidity index (mean) | 2.3                            | 2.3                            |
| For-profit health plan (%)        | 27                             | 33                             |
| Medical group/network model (%)   | 39                             | 30                             |
| IPA/network model (%)             | 24                             | 31                             |
| Medical group/staff model (%)     | 38                             | 29                             |

## Appendix

Table 2a. Percentage of participants receiving diabetes processes of care by profit status and model type, adjusted only for clustering within plans and provider groups.

| Diabetes process of care        | For profit health plans |             | Non-profit health plans |             |             |
|---------------------------------|-------------------------|-------------|-------------------------|-------------|-------------|
|                                 | Group/network           | IPA/network | Group/network           | IPA/network | Group/staff |
| Dilated eye exam                | 83                      | 73*         | 78                      | 65          | 82          |
| Urine protein checked           | 84                      | 69*         | 81                      | 86          | 90          |
| Foot exam performed             | 92                      | 83*         | 88                      | 80          | 84          |
| Lipids checked                  | 75                      | 62*         | 54                      | 64          | 73          |
| Hemoglobin A1c checked          | 91                      | 85*         | 86                      | 87          | 86          |
| Aspirin advised or recorded     | 44                      | 47          | 54                      | 53          | 59          |
| Influenza vaccination given     | 61                      | 58*         | 61                      | 64          | 66          |
| Sum of 7 process measures, mean | 5.6                     | 4.9*        | 5.0                     | 5.1         | 5.3         |

\*Indicates a significant difference between for-profit group/network and for-profit IPA models at  $p < 0.001$  except for dilated eye exam, urine protein, lipids, and hemoglobin A1C, which were significant at  $p < 0.02$ . No other significant differences between other model types existed.

## Appendix

Table 3a. Percentage differences and 95% confidence intervals in performance of processes of care by health plan profit status and model type.

FP = for-profit and NP = non-profit, adjusted for covariates and clustering.

|                                                                                    | <u>FP group/network -</u> | <u>NP group/network -</u> | <u>FP group/network -</u> | <u>FP IPA/network-</u> | <u>NP group/staff -</u> | <u>NP group/staff -</u> |
|------------------------------------------------------------------------------------|---------------------------|---------------------------|---------------------------|------------------------|-------------------------|-------------------------|
|                                                                                    | <u>FP IPA/network</u>     | <u>NP IPA/network</u>     | <u>NP group/network</u>   | <u>NP IPA/network</u>  | <u>NP group/network</u> | <u>NP IPA/network</u>   |
| <b>Differences in percentages between model types and 95% confidence intervals</b> |                           |                           |                           |                        |                         |                         |
| Dilated eye exam                                                                   | 10 (3, 18)*               | 4 (-7, 15)                | 2 (-11, 15)               | -4 (-19, 10)           | 1 (-13, 15)             | 6 (-12, 23)             |
| Urine protein check                                                                | 21 (10, 31)*              | -1 (-17, 15)              | 5 (-14, 23)               | -17 (-39, 5)           | 10 (-8, 27)             | 9 (-10, 27)             |
| Foot exam                                                                          | 10 (4, 16)*               | 6 (-7, 19)                | 4 (-6, 14)                | 0 (-16, 16)            | 3 (-18, 11)             | 2 (-14, 19)             |
| Lipid check                                                                        | 13 (4, 21)*               | -6 (-22, 10)              | 16 (-7, 39)               | -3 (-24, 19)           | 12 (-17, 40)            | 6 (-28, 39)             |
| HbA1c check                                                                        | 6 (1, 12)*                | 2 (-6, 11)                | 4 (-7, 15)                | 0 (-12, 12)            | 0 (-14, 14)             | 2 (-17, 21)             |
| Aspirin advice                                                                     | 0 (-6, 7)                 | 6 (-12, 23)               | -15 (-32, 2)              | -9 (-28, 10)           | 0 (-20, 19)             | 5 (-14, 25)             |
| Influenza vaccine                                                                  | 15 (8, 23)*               | 2 (-12, 15)               | 6 (-8, 20)                | -8 (-23, 7)            | 1 (-14, 17)             | 3 (-13, 19)             |
| Composite (mean)                                                                   | 0.7 (0.4, 1.0)*           | 0 (-0.3, 0.3)             | 0.4 (-0.2, 1.0)           | -0.3 (-0.9, 0.3)       | 0.2 (-0.5, 0.9)         | 0.3 (-0.5, 1.0)         |

\*Indicates a significant difference between for-profit group/network and for-profit IPA/network models at  $p < 0.001$  except for dilated eye exam, lipids, and hemoglobin A1C, which were significant at  $p < 0.01$ ,  $p < 0.01$ , and  $p < 0.027$  respectively. No significant differences between other model types existed.
